# Supplementary material
Source: publisher figshare collection journal article supplement (https://acs.figshare.com/ndownloader/files/4426309)
Supplement: Supplementary file 1 [file 4426309]

# Micropatterned Surfaces through Moisture-Induced Phase-Separation of Polystyrene-Clay Nanocomposite Particles

*Bindu P. Nair and Chorappan Pavithran\**

Materials and Minerals Division

National Institute for Interdisciplinary Science and Technology (NIIST)

Council of Scientific and Industrial Research (CSIR)

Thiruvananthapuram-695019, India

Fax: 0091-471-2491712

E-mail: cpniist@gmail.com

## **Supporting Information- Figure Captions**

**Figure S1.** SEM image (Low magnification) of PCN micropatterned film from 20 mgmL<sup>-1</sup> PCN/THF.

**Figure S2.** SEM image (high magnification) of PCN micropatterned film from 20 mgmL<sup>-1</sup>/THF.

**Figure S3.** Optical transmission micrographs of PCN drop cast from THF of solution concentration of (a) 1 (b) 5 (c) 10 (d) 20 and (e) 50 mgmL<sup>-1</sup>. Scale bar represents (a & e) 20 μm, (b, c & d) 10 μm.

## Supporting Information-Figures

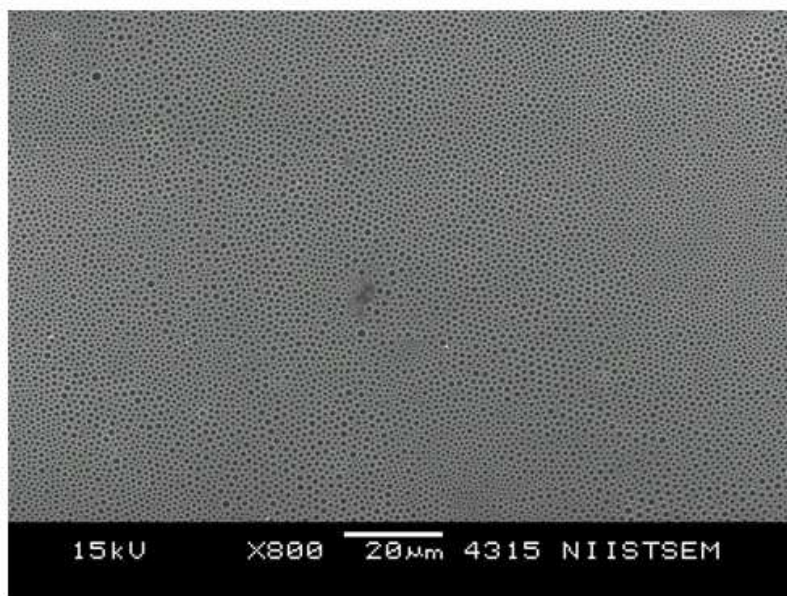

**Figure S1.** SEM image (Low magnification) of PCN micropatterned film from 20 mgmL<sup>-1</sup> PCN/THF.

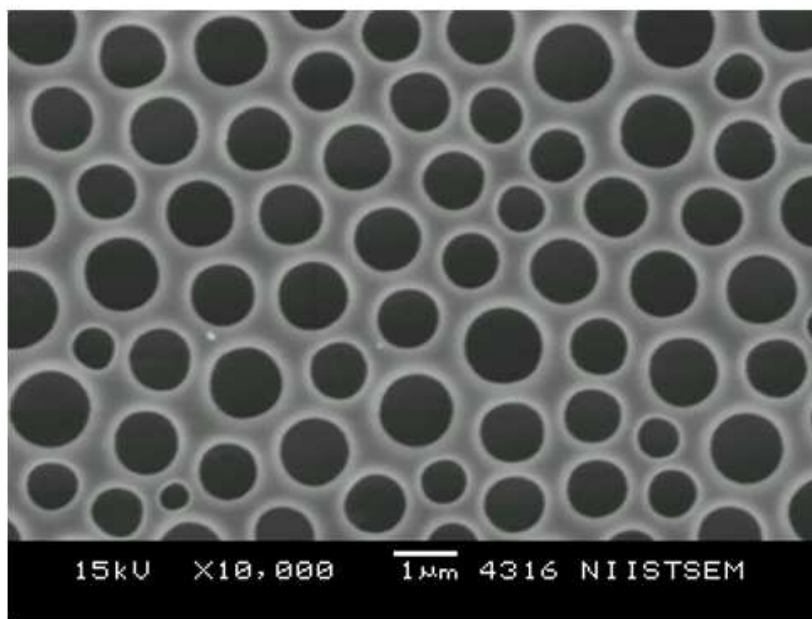

**Figure S2.** SEM image (high magnification) of PCN micropatterned film from 20 mgmL<sup>-1</sup> PCN/THF.

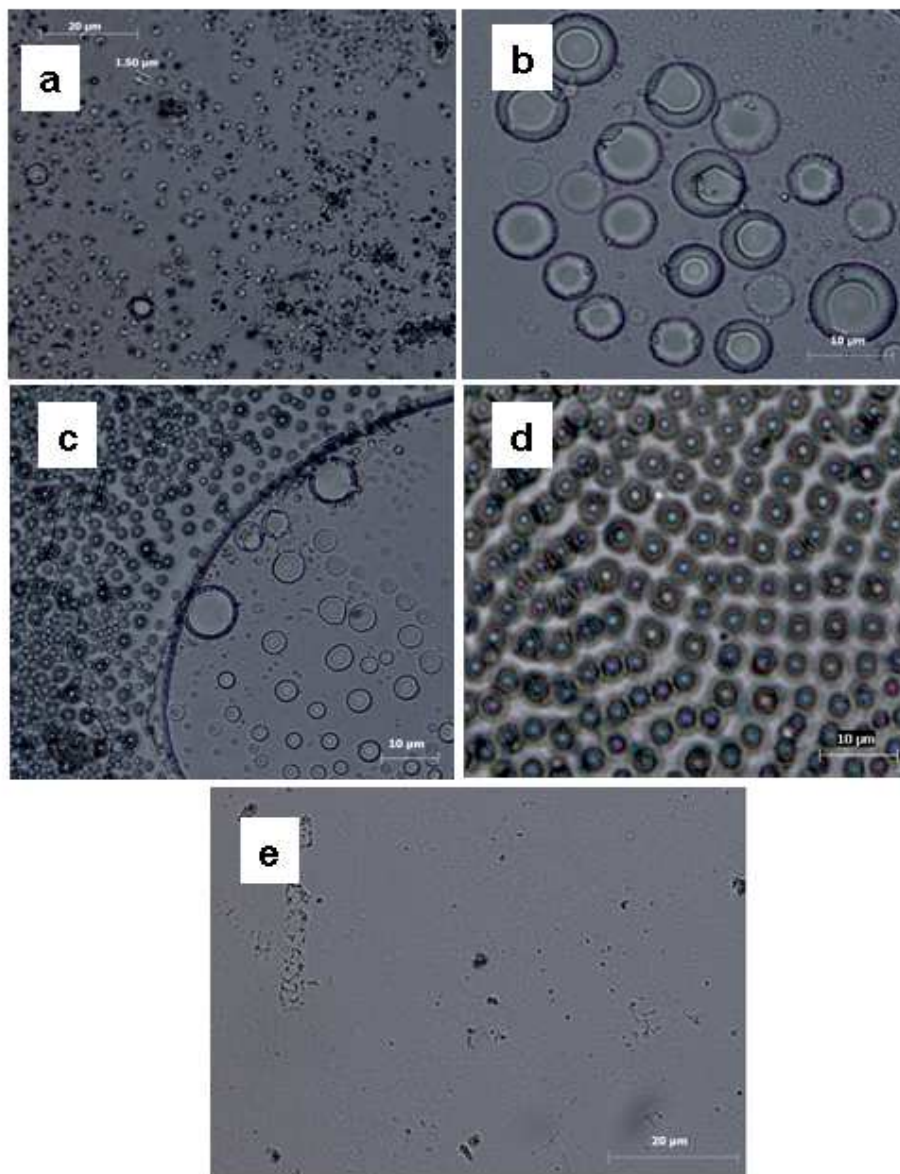

**Figure S3.** Optical transmission micrographs of PCN drop cast from THF of solution concentration (a) 1 (b) 5 (c) 10 (d) 20 and (e) 50  $\text{mgmL}^{-1}$ . Scale bar represents (a & e) 20  $\mu\text{m}$ , (b, c & d) 10  $\mu\text{m}$ .
